# Supplementary material for: Click Triazole as a Linker for Pretargeting Strategies: Synthesis, Docking Investigations, Fluorescence Diagnosis, and Antibacterial Action Studies
Source: Molecules. 2023 Mar 18;28(6):2758. doi: 10.3390/molecules28062758 (PMC10057994; doi:10.3390/molecules28062758)
Supplement: Supplementary file 1 [file molecules-28-02758-s001.zip › Supplementary Materials.pdf]

# Click Triazole as a Linker for Pretargeting Strategies: Synthesis, Docking Investigations, Fluorescence Diagnosis, and Antibacterial Action Studies

Qian Liu <sup>1</sup>, Mingxia Zhao <sup>2</sup>, Cairong Song <sup>1</sup>, Jiankang Sun <sup>1</sup>, Jiali Tao <sup>2</sup>, Bin Sun <sup>2</sup>, and Junbing Jiang <sup>1,2,\*</sup>

<sup>1</sup> Department of Veterinary Medicine, Shanxi Agricultural University, Jinzhong 0030801, China

<sup>2</sup> Department of Mining Engineering, Shanxi Institute of Engineering and Technology, Yangquan 045000, China

\* Correspondence: sxndjeffrey@126.com (J.J.)

Supporting information <sup>1</sup>H, <sup>13</sup>C NMR and MS of all products. Figure S1-S7

The HPLC-MS results for the three "click" reactions. Figure S8-S10

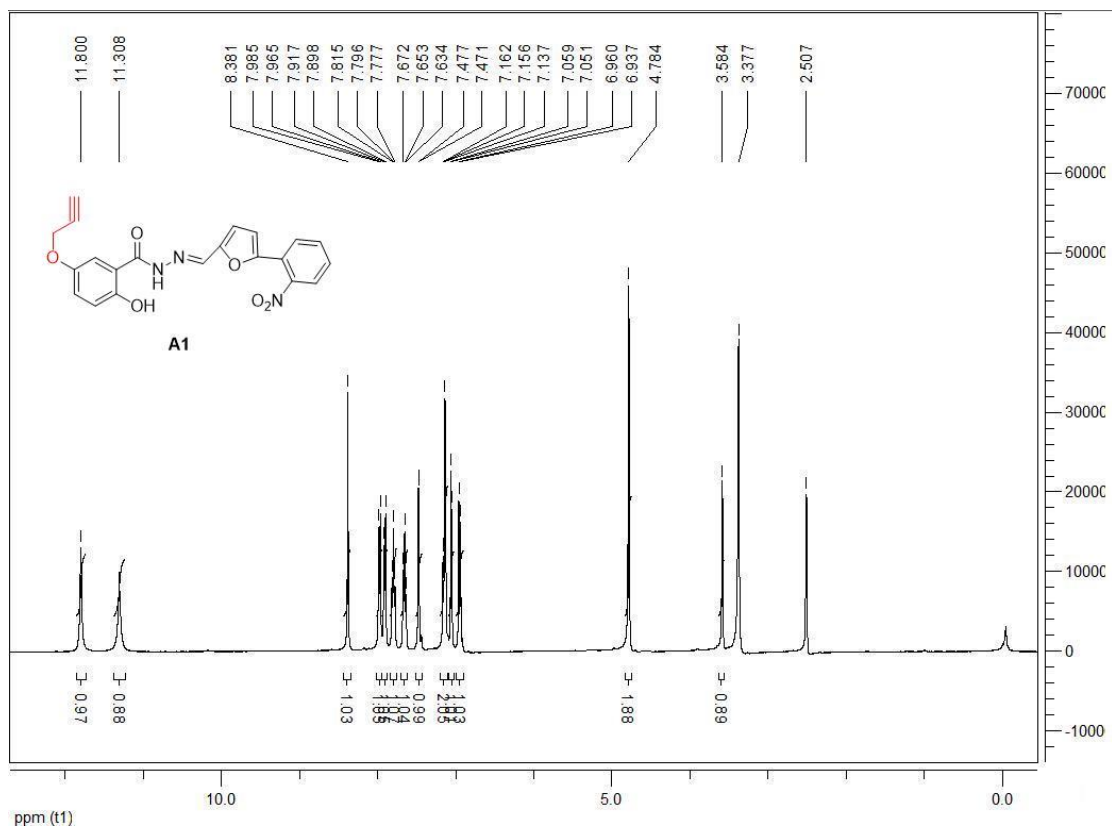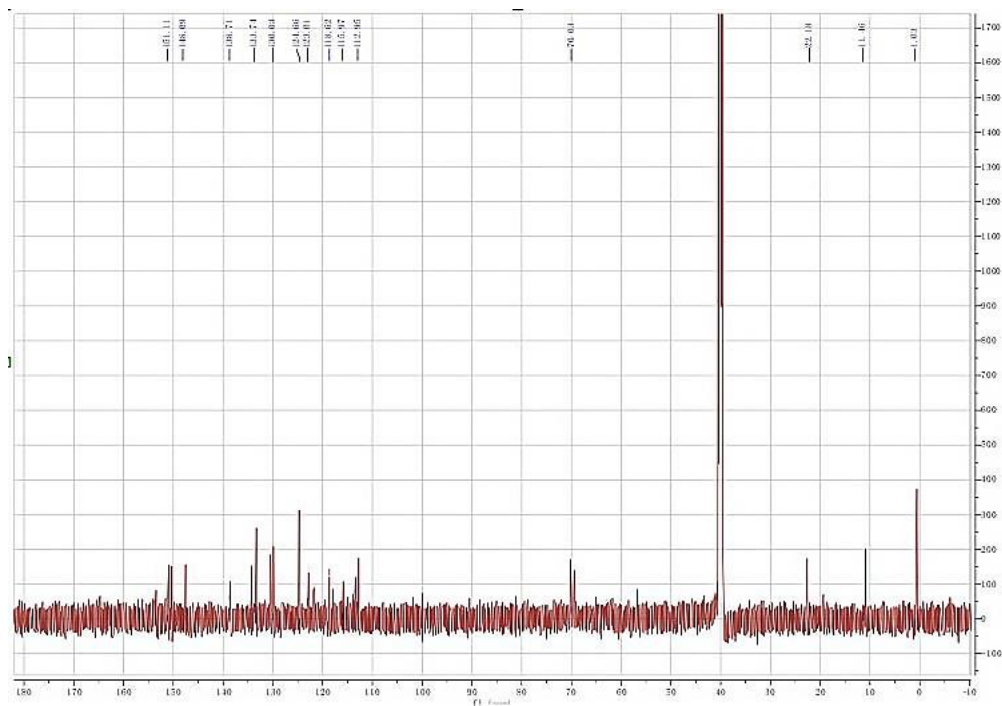

20210321\_A1 #81-144 RT: 0.37-0.51 AV: 64 NL: 8.77E4  
T: ITMS - c ESI Full ms [200.00-1000.00]

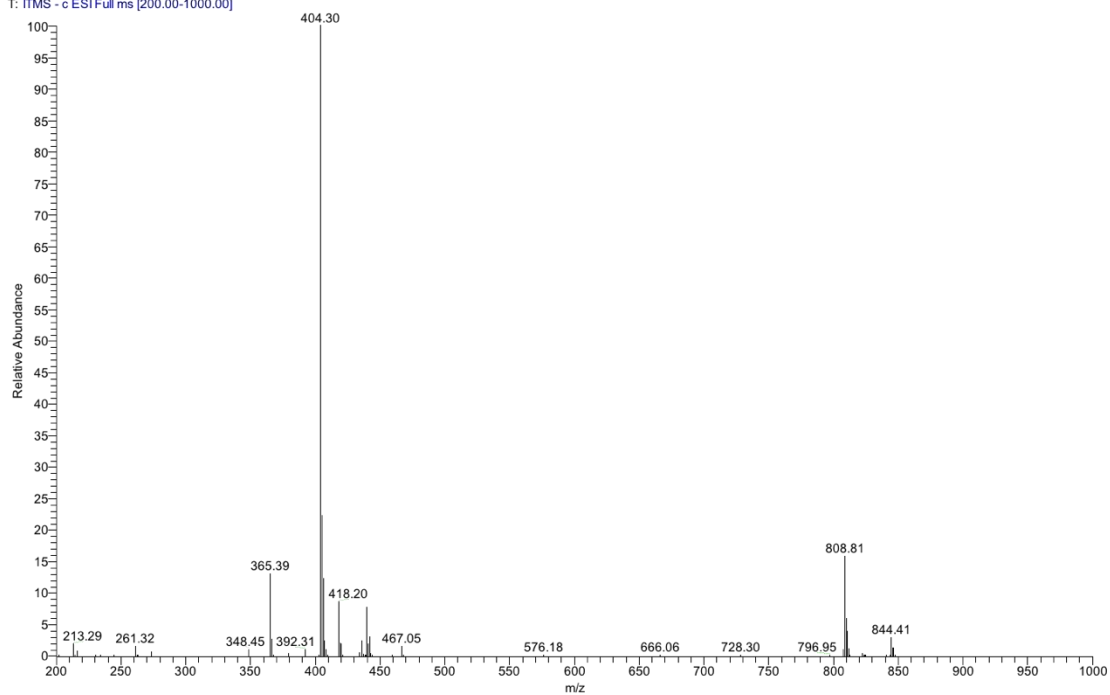

Figure S1.  $^1\text{H}$ ,  $^{13}\text{C}$  NMR and MS of A1.

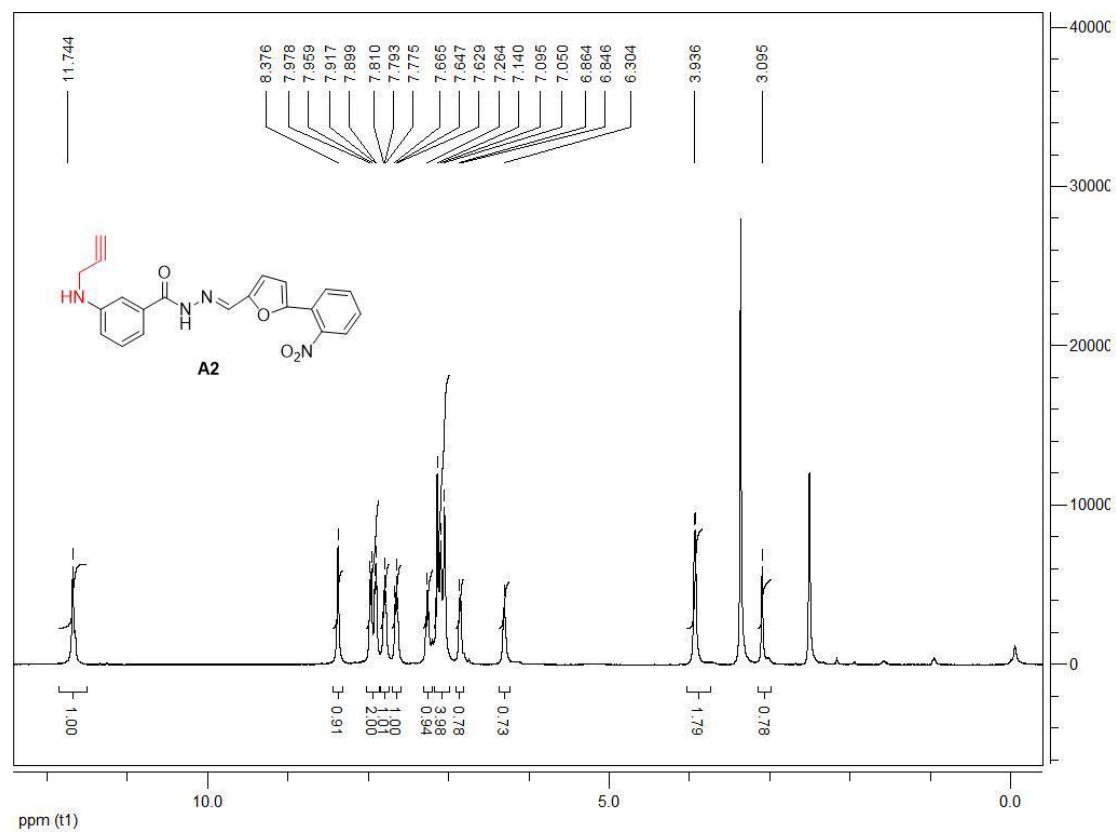

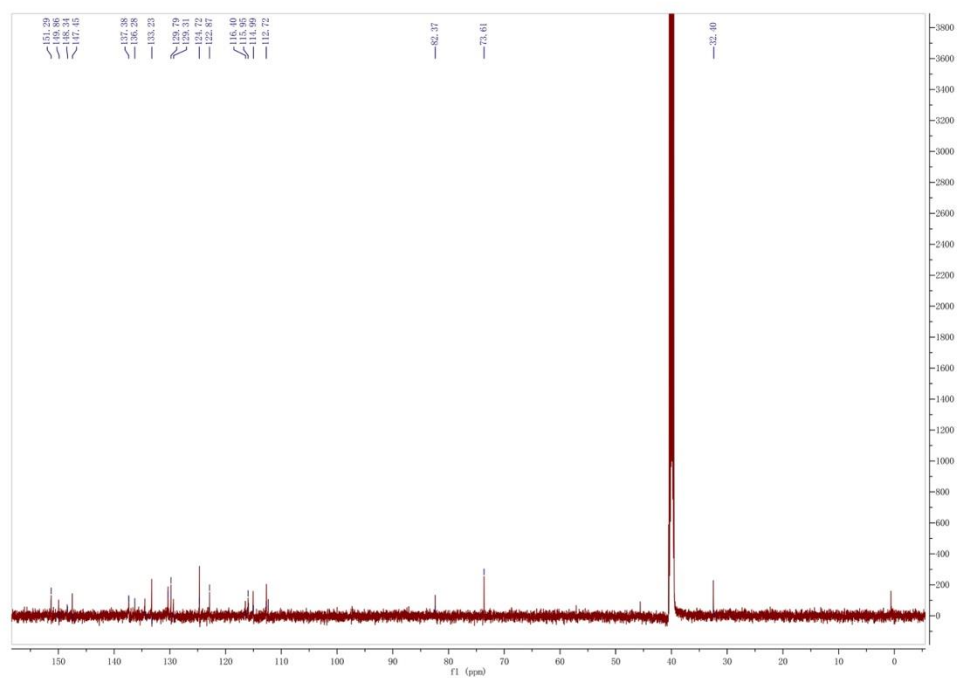

20210321\_A2 #235 RT: 1.17 AV: 1 NL: 1.76E4  
T: ITMS - c ESI Full ms [200.00-1000.00]

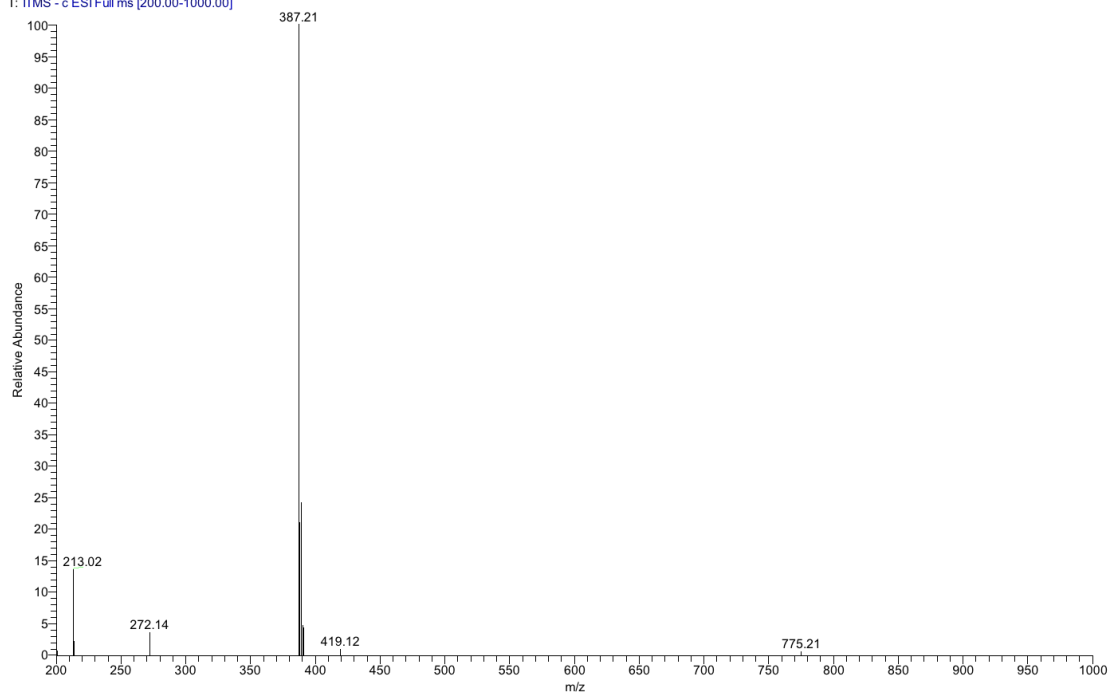

**Figure S2.**  $^1\text{H}$ ,  $^{13}\text{C}$  NMR and MS of **A2**.

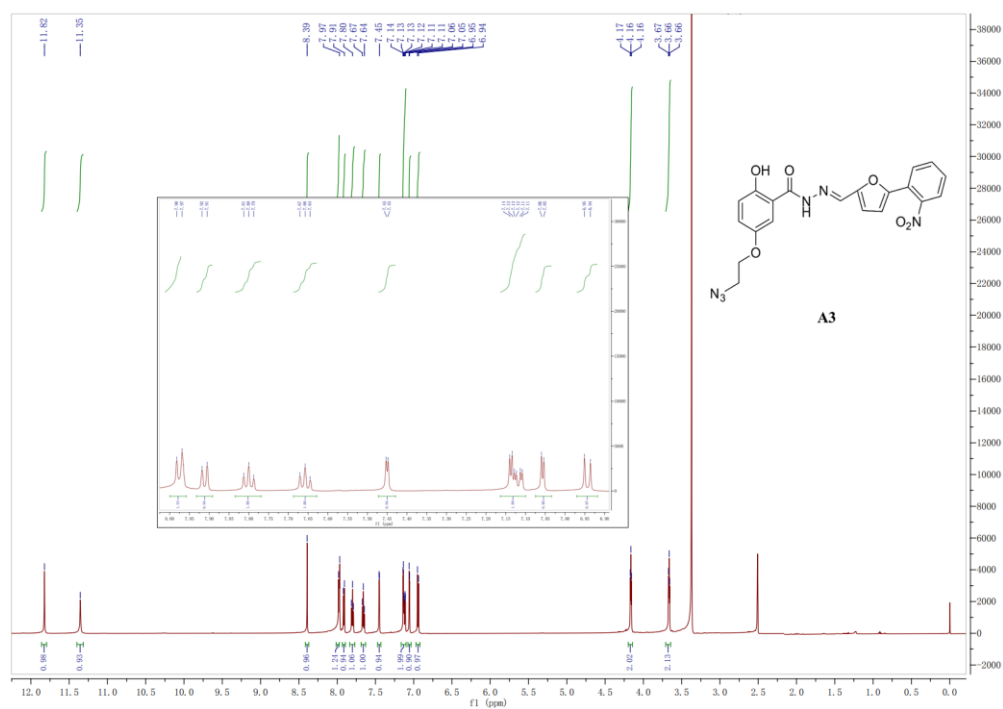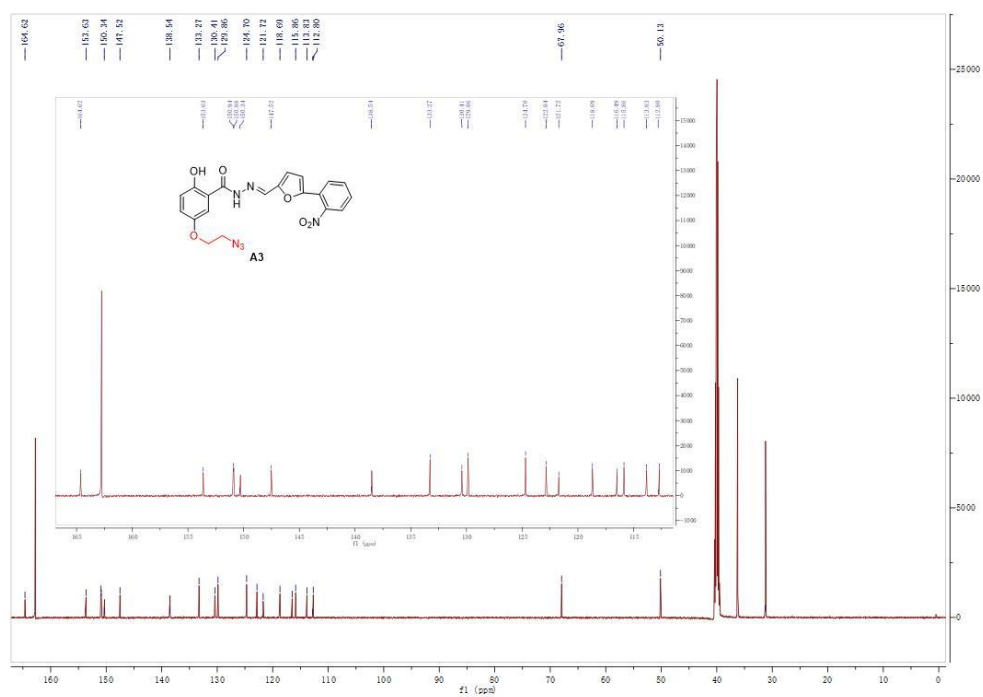

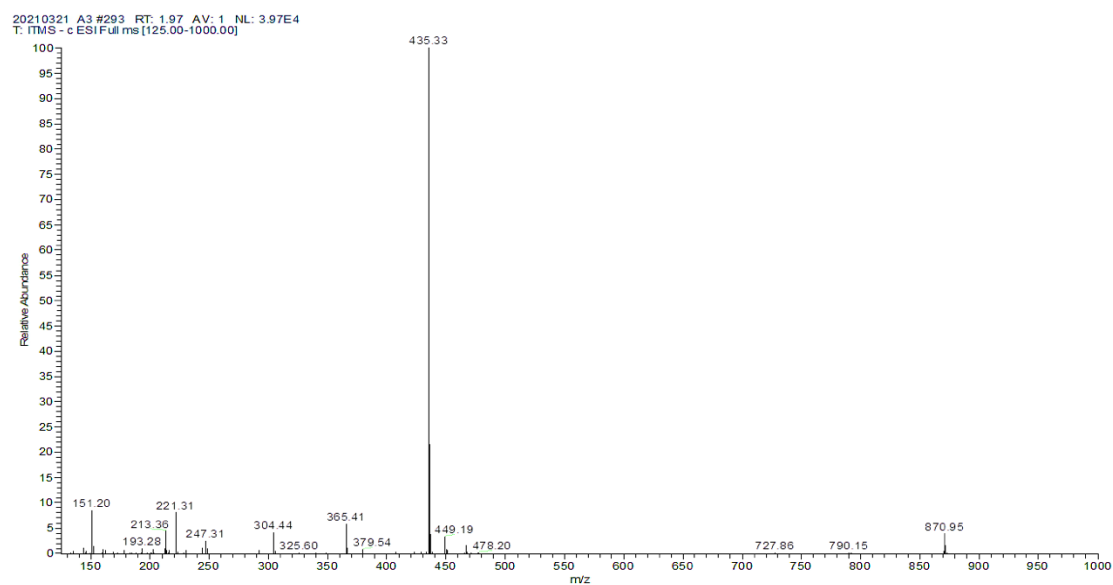

Figure S3.  $^1\text{H}$ ,  $^{13}\text{C}$  NMR and MS of A3.

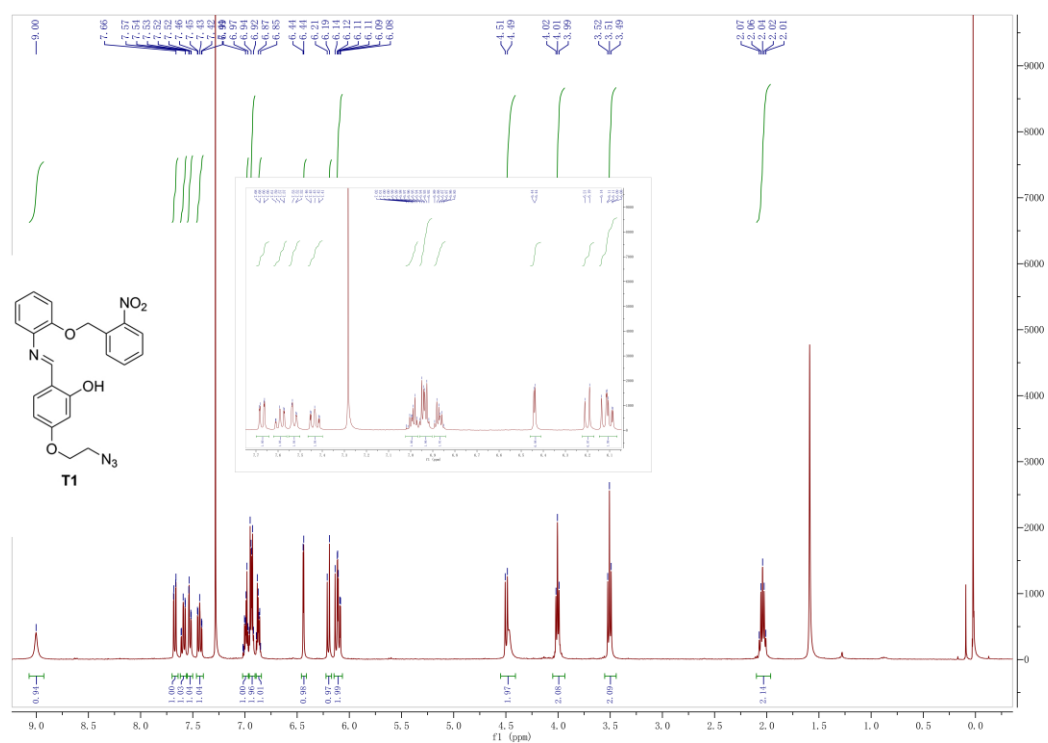

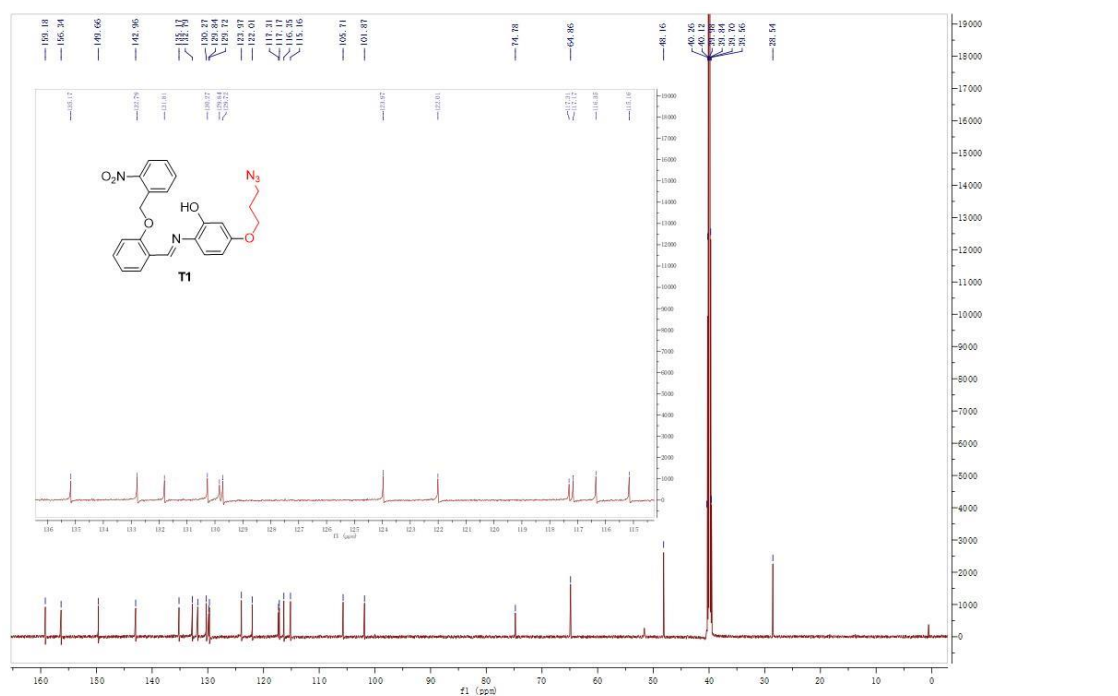

0215-ZMX T1 18 (0.648) Cm (8:21-23:28)

1: Scan ES+  
4.69e6

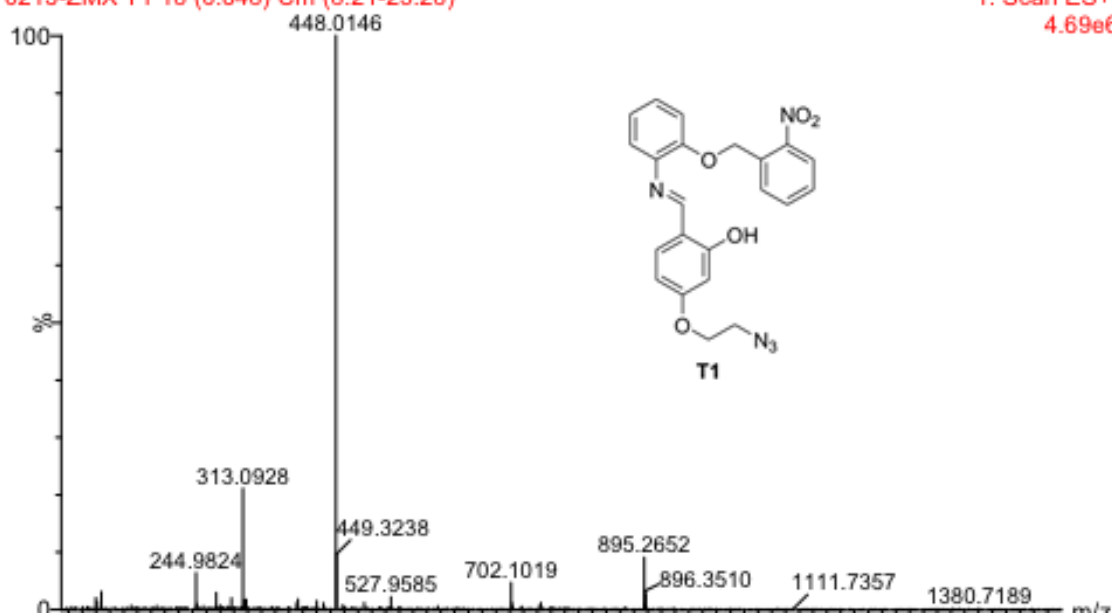

Figure S4. <sup>1</sup>H, <sup>13</sup>C NMR and MS of T1.

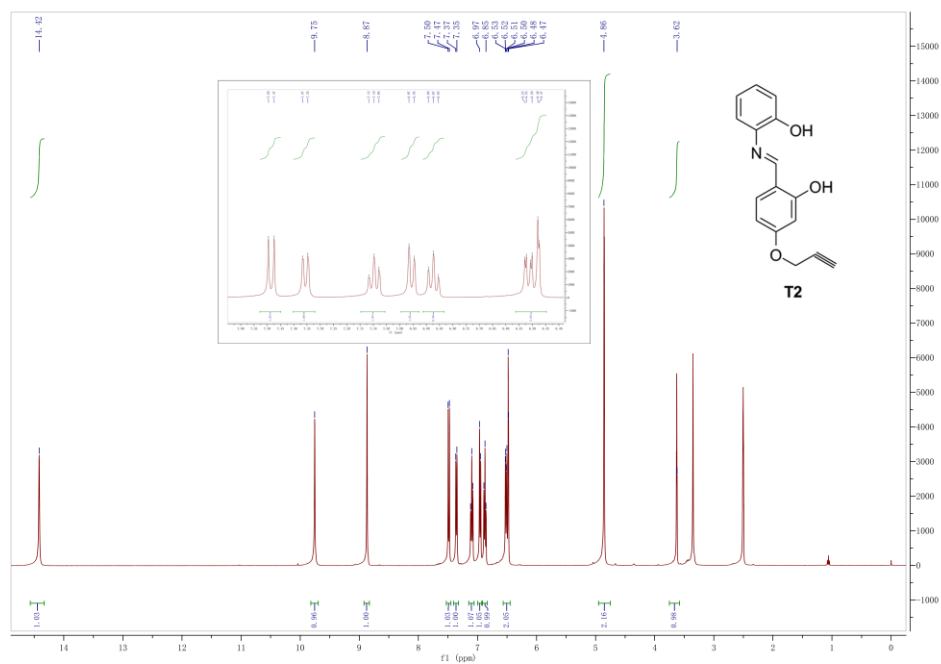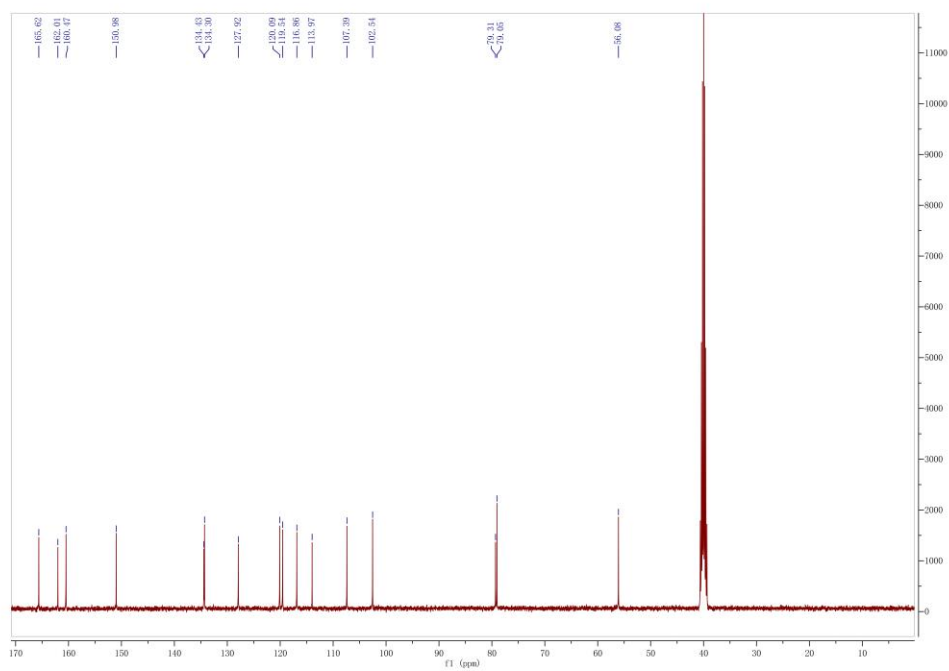

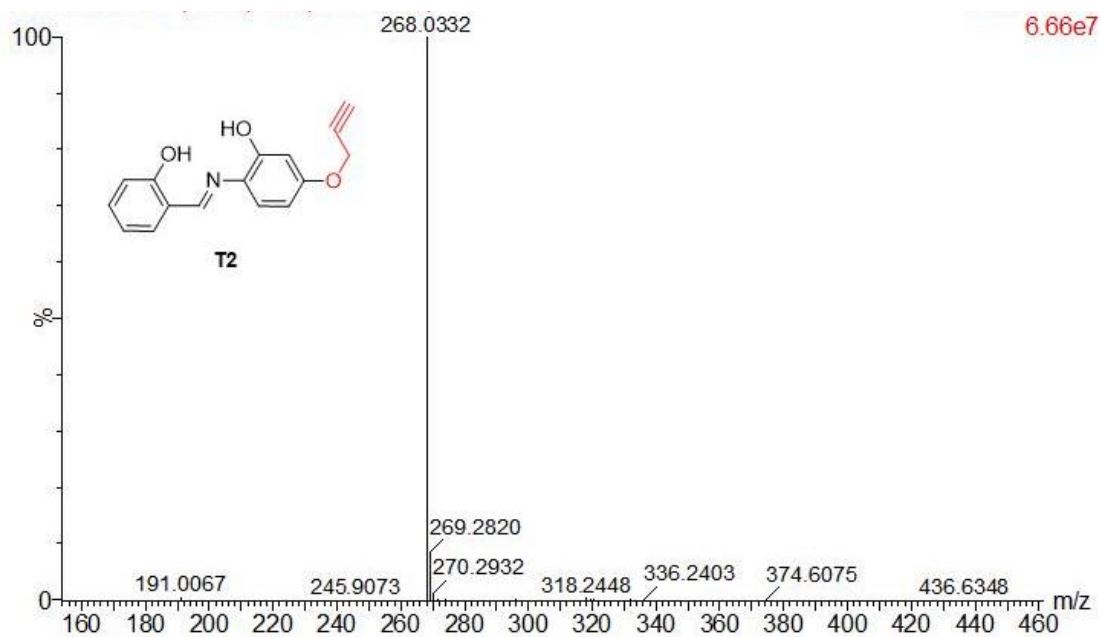

**Figure S5.**  $^1\text{H}$ ,  $^{13}\text{C}$  NMR and MS of **T2**.

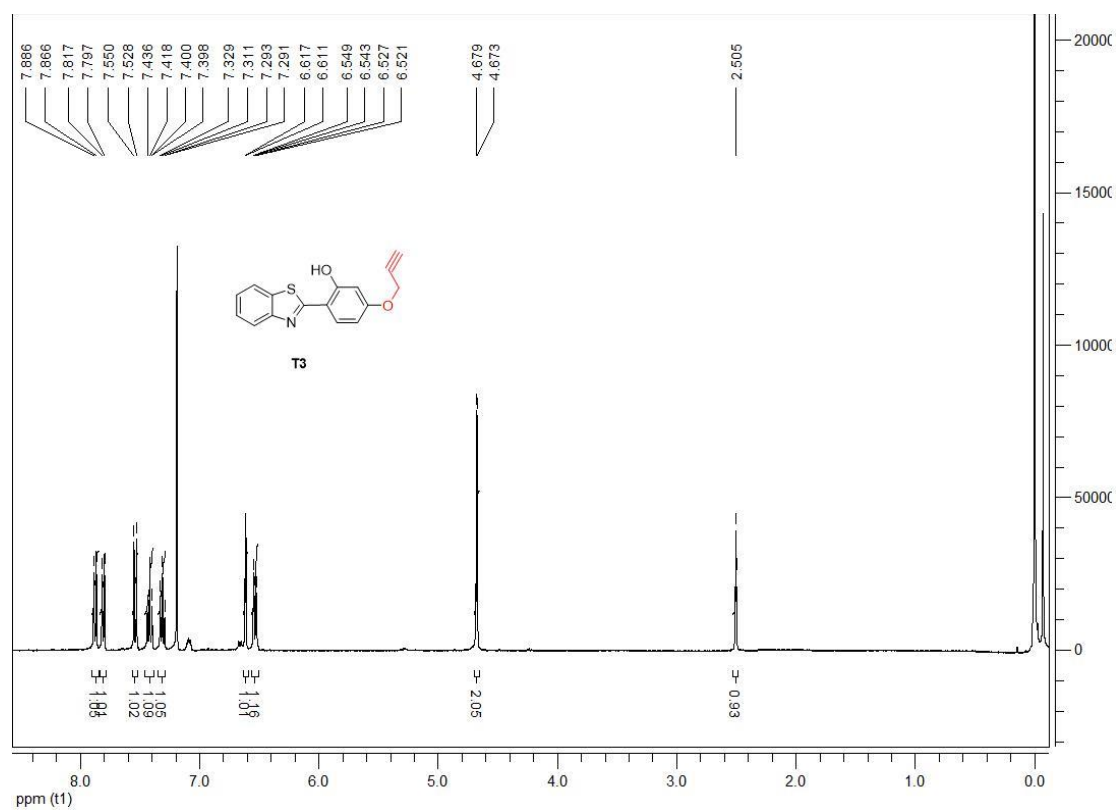

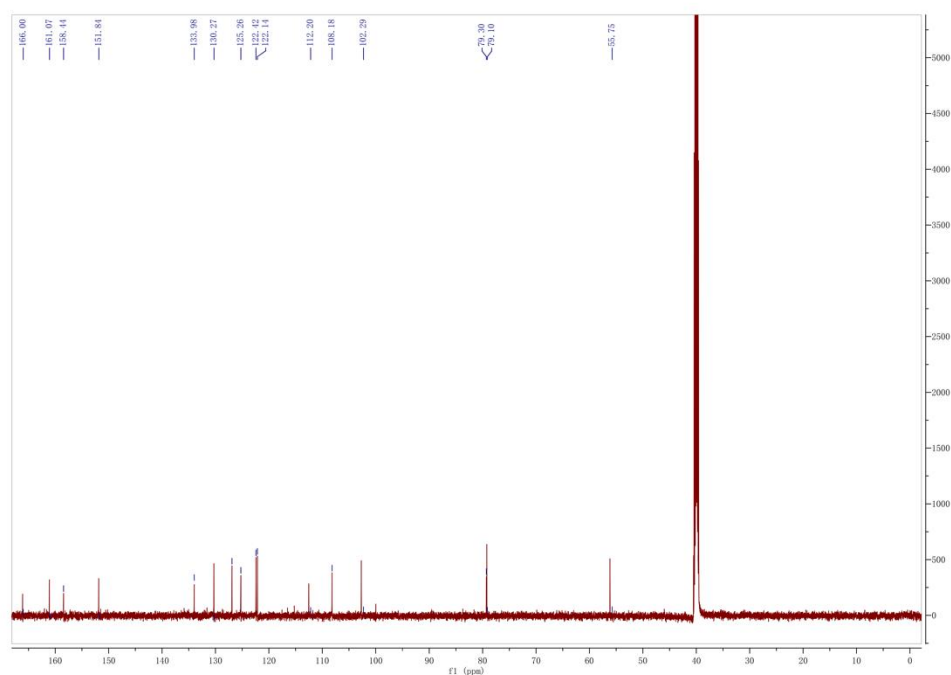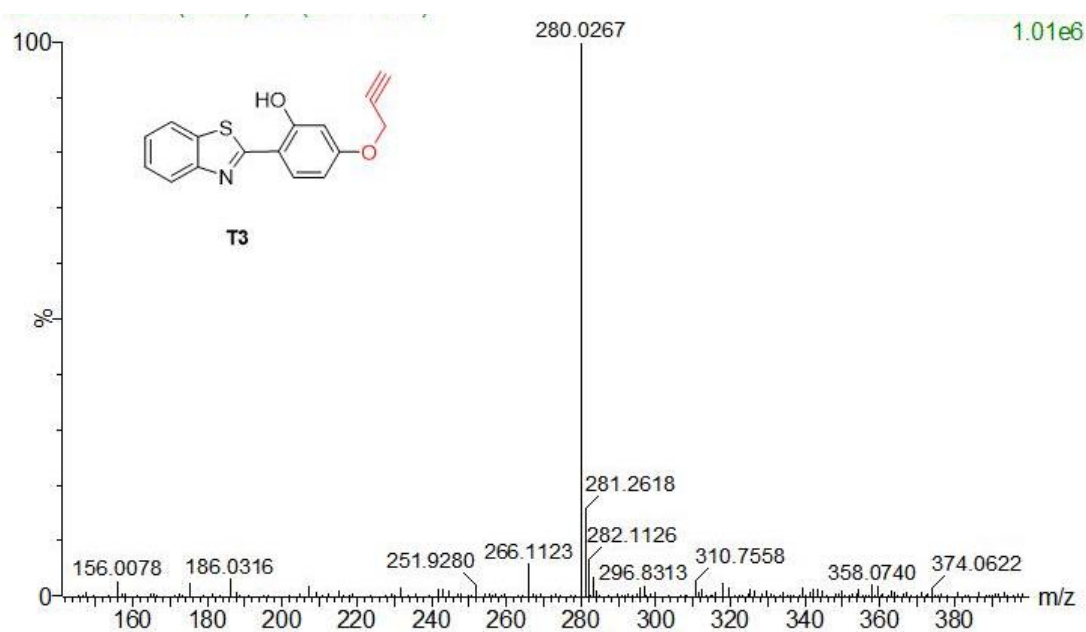

Figure S6. <sup>1</sup>H, <sup>13</sup>C NMR and MS of T3.

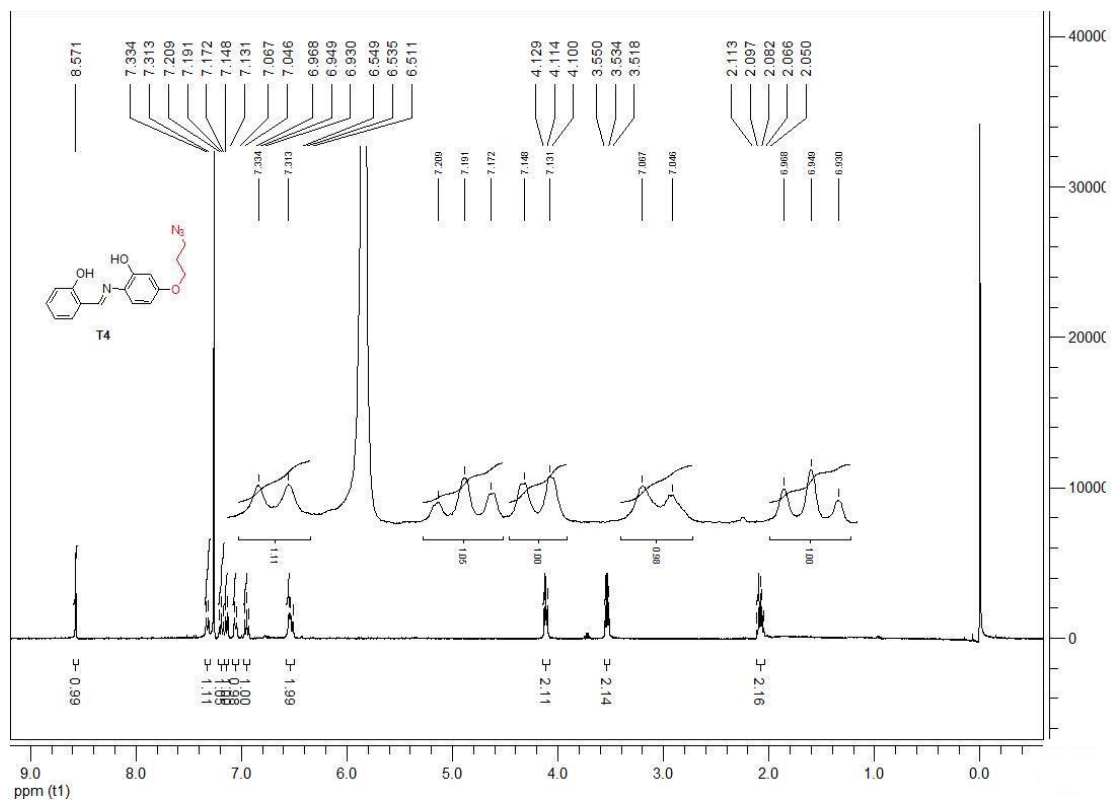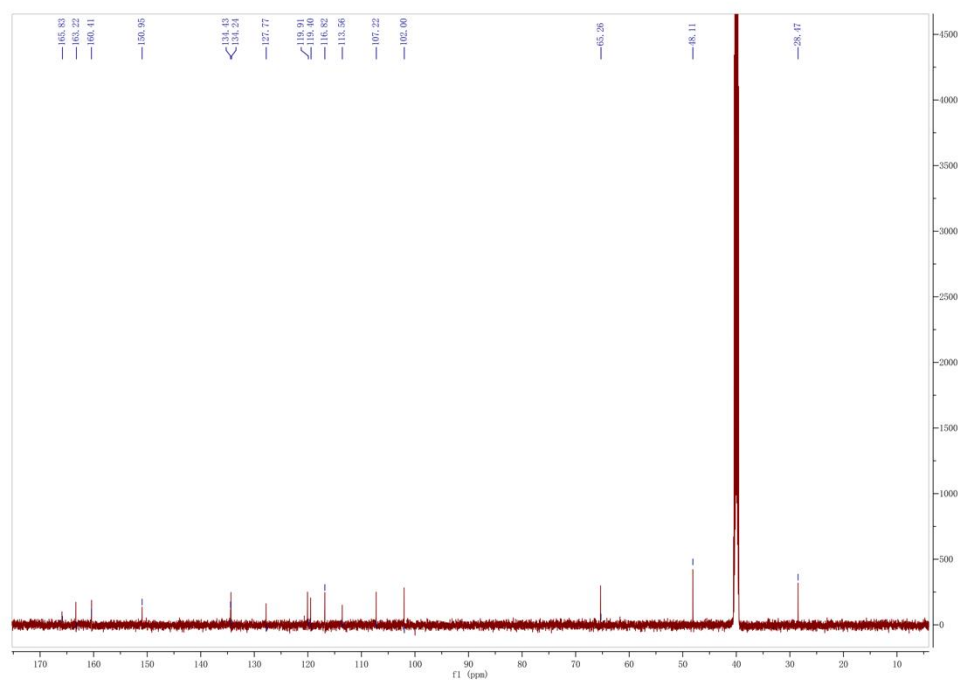

20210321\_T4 #189-236 RT: 1.39-1.74 AV: 48 NL: 7.55E1  
T: ITMS - c ESI Full ms [200.00-1000.00]

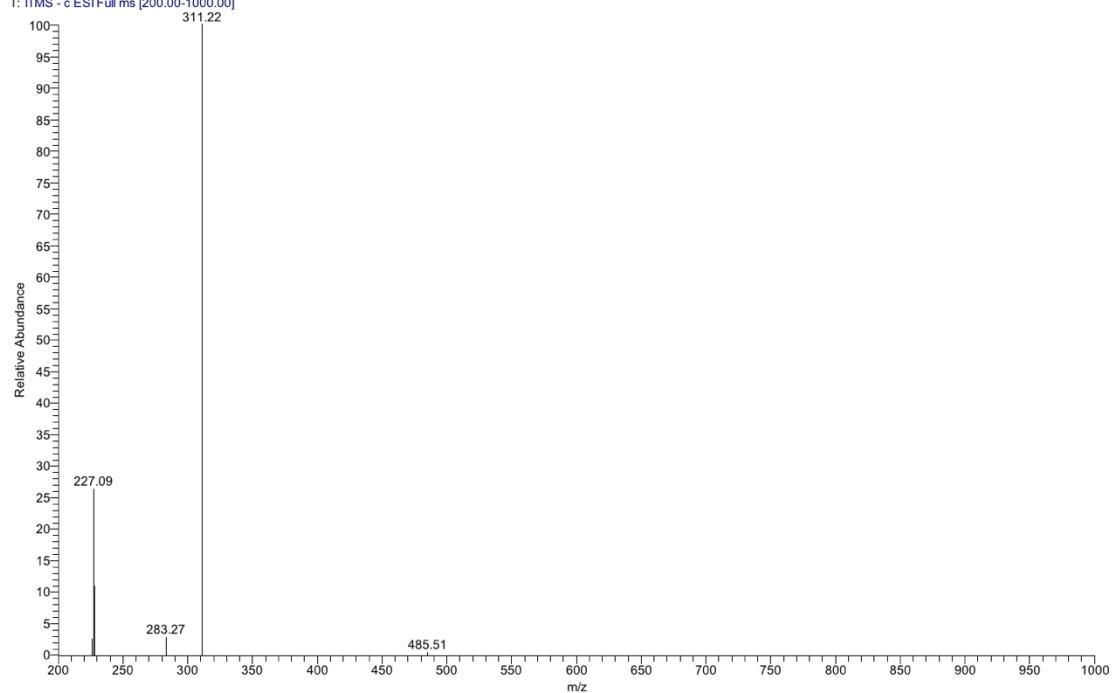

**Figure S7.**  $^1\text{H}$ ,  $^{13}\text{C}$  NMR and MS of **T4**.

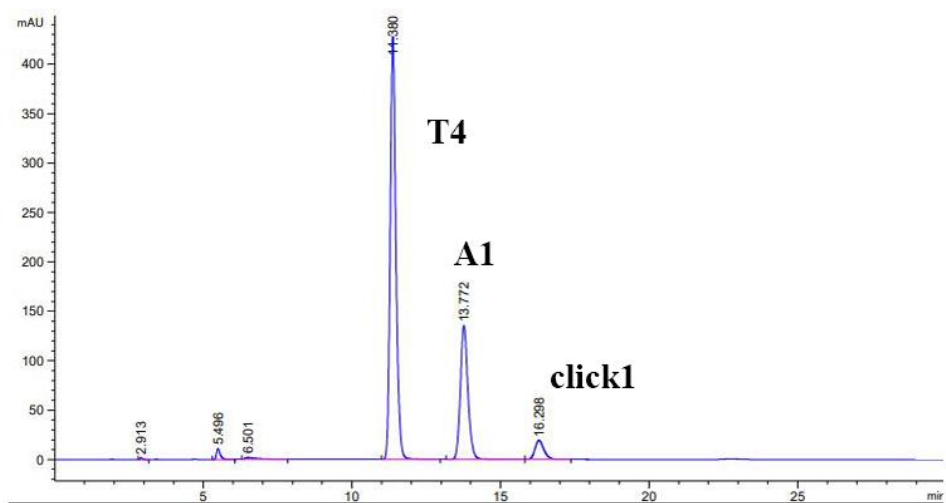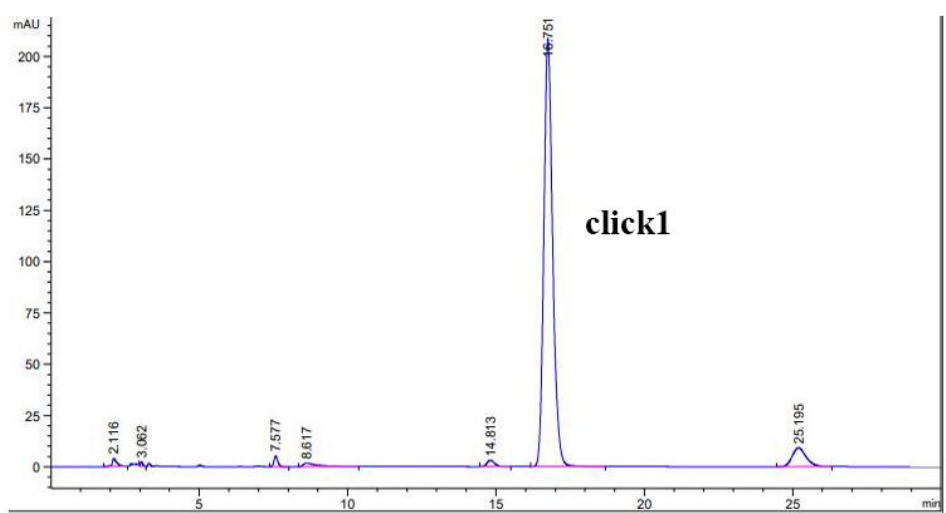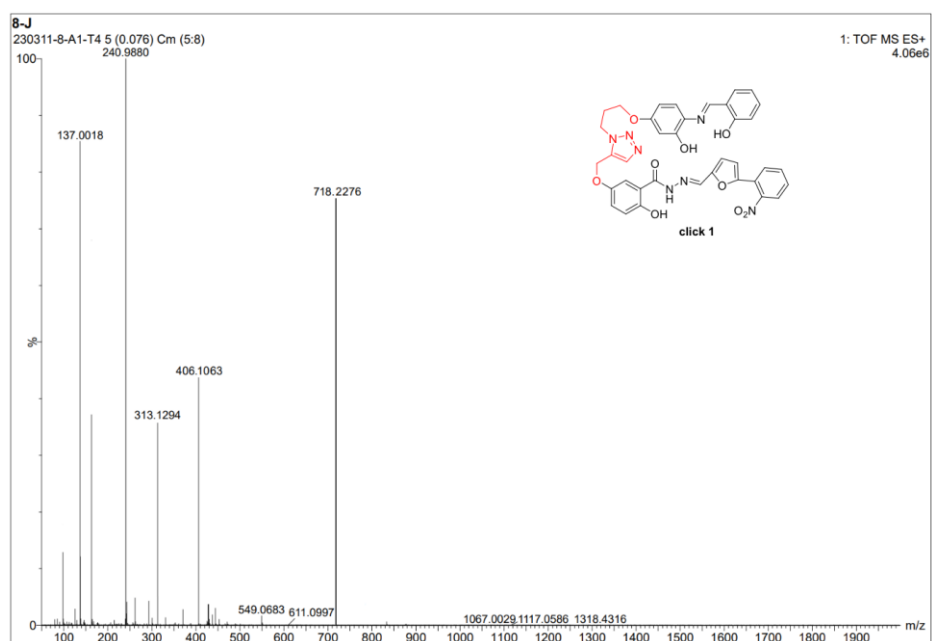

**Figure S8.** The HPLC-MS results for the click1 reaction.

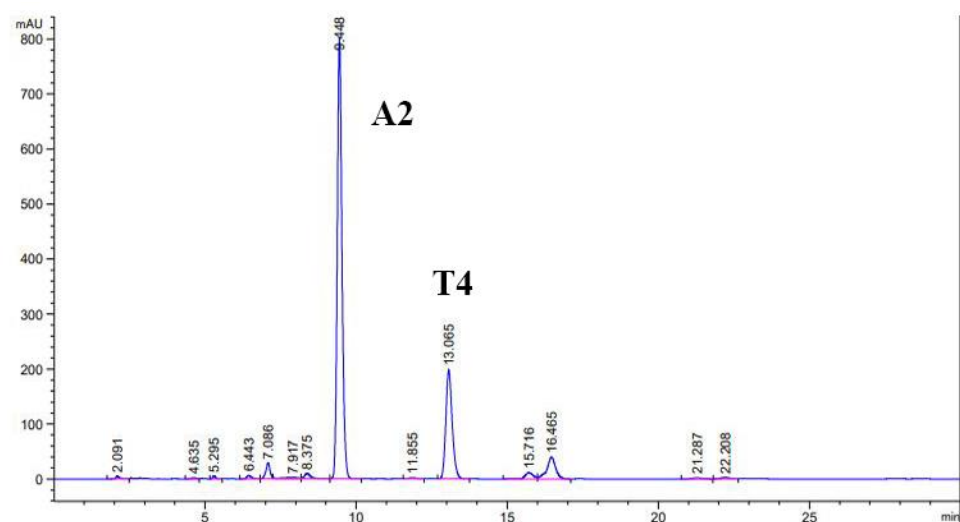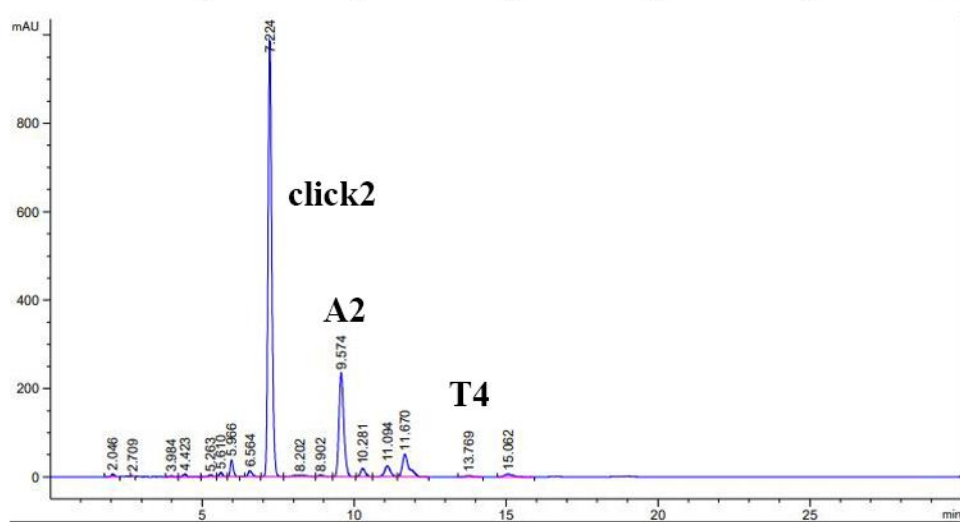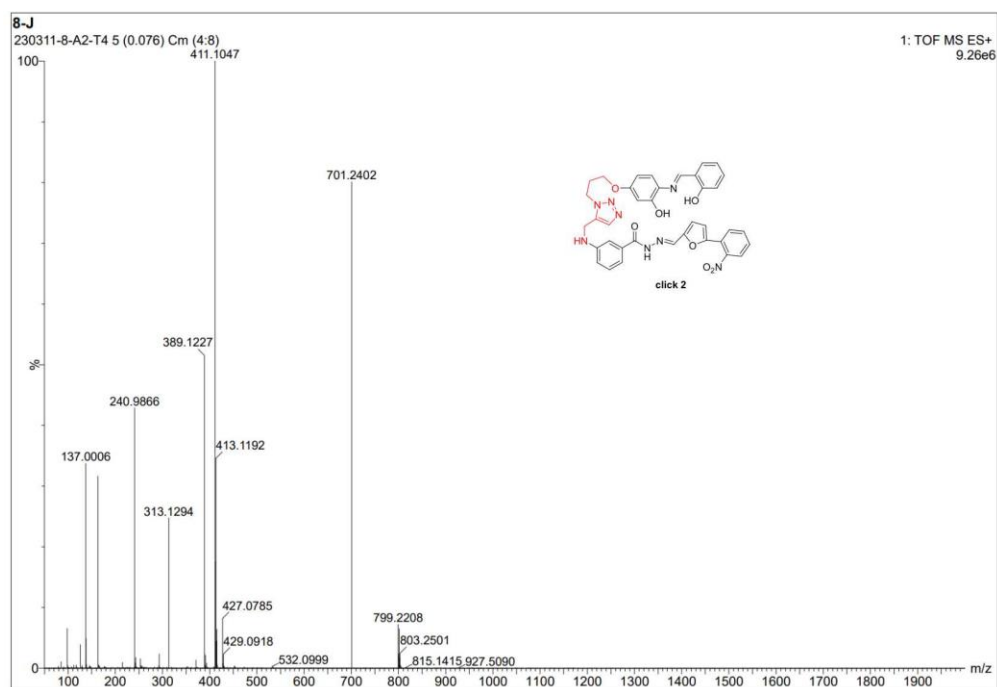

Figure S9. The HPLC-MS results for the click2 reaction.

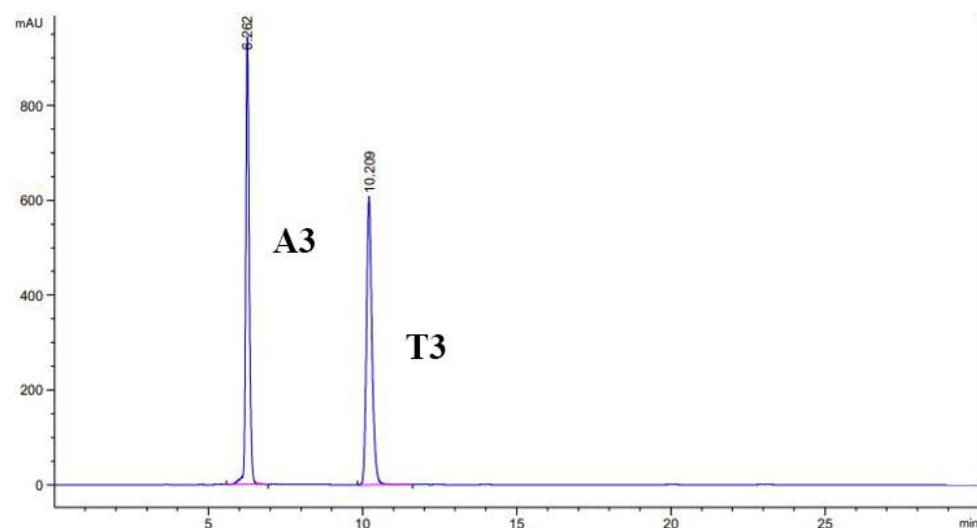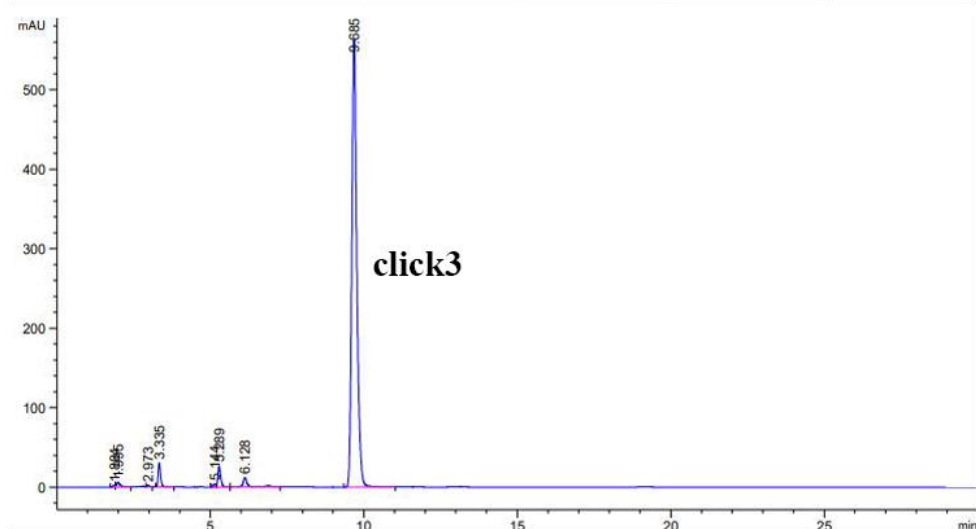

20210321\_A3+T3 #538-552 RT: 4.92-5.03 AV: 15 NL: 3.59E4  
T: ITMS - c ESI Full ms [80.00-1000.00]

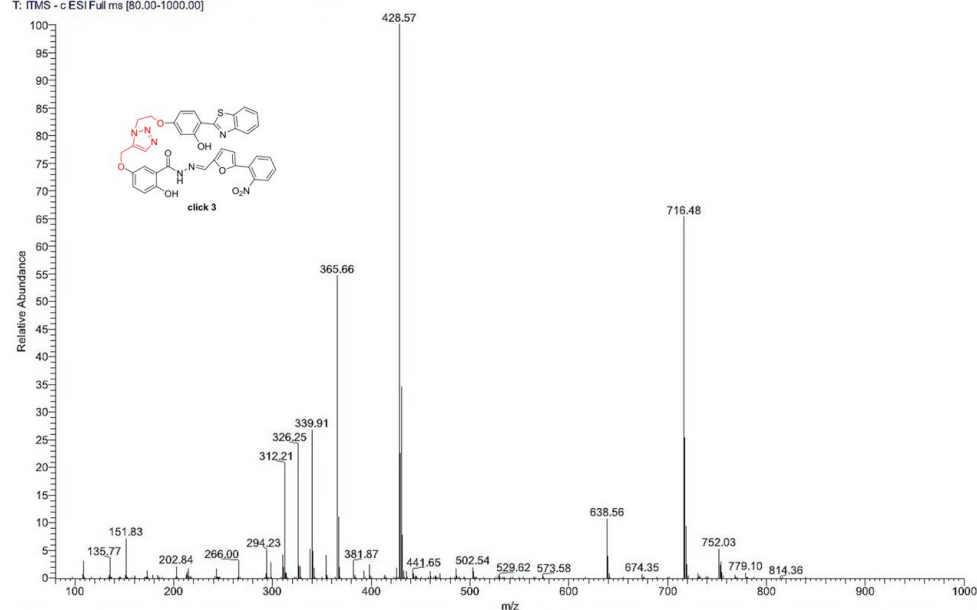

**Figure S10.** The HPLC-MS results for the click3 reaction.
